# Supplementary material for: Enhancing Water-Sensitive Urban Design in Chiang Mai through a Research–Design Collaboration
Source: MDPI journal article supplement (doi:10.3390/su152216127), 2023-11-20
Supplement: s1 [file s1]

Archive with 1 entries (1 files):
- sustainability-2697006-supplementary.pdf
